# Supplementary material for: CXCL1/CXCR2 and CCL5/CCR1/CCR5 Promote Radiation-Induced Reprogramming of Breast Non-cancer Stem Cells into Cancer Stem Cells and Predict Patient Clinical Outcome
Source: Preprints.org preprint supplement (doi:10.20944/preprints202402.0403.v1), 2024-02-07
Supplement: Supplementary file 1 [file supplementary]

**Supplementary Table 1: Patients databases used for analysis**

| Reference                                          | Source of data                                                                                                      | N° of samples | Technological platform      | N° of probe sets | N° of samples used |
|----------------------------------------------------|---------------------------------------------------------------------------------------------------------------------|---------------|-----------------------------|------------------|--------------------|
| van't Veer et al.,<br>Nature 2002                  | <a href="http://www.rii.com/publications/2002/vantveer.html">http://www.rii.com/publications/2002/vantveer.html</a> | 117           | Agilent Hu25K               | 25K              | 117                |
| van de Vijver et al.,<br>NEJM 2002                 | <a href="http://microarray-pubs.stanford.edu/wound_NKI/">http://microarray-pubs.stanford.edu/wound_NKI/</a>         | 295           | Agilent Hu25K               | 25K              | 254                |
| Expression Project for<br>Oncology (expO),<br>2005 | <a href="https://expo.intgen.org/geo">https://expo.intgen.org/geo</a><br>GEO: GSE2109                               | 348           | Affymetrix<br>U133 Plus 2.0 | 54K              | 348                |
| Wang Y et al.,<br>Lancet 2005                      | GEO: GSE2034                                                                                                        | 286           | Affymetrix<br>U133A         | 22K              | 286                |
| Minn AJ et al.,<br>Nature 2005                     | GEO: GSE2603                                                                                                        | 99            | Affymetrix<br>U133A         | 22K              | 99                 |
| Farmer P et al.,<br>Oncogene 2005                  | GEO: GSE1561                                                                                                        | 49            | Affymetrix<br>U133A         | 22K              | 49                 |
| Ivshina et al.,<br>Cancer Res 2006                 | GEO: GSE4922,<br>GSE1456                                                                                            | 448           | Affymetrix<br>U133 A+B      | 2x22K            | 448                |
| Sotiriou C et al.,<br>J Natl Cancer Inst 2006      | GEO: GSE2990                                                                                                        | 189           | Affymetrix<br>U133A         | 22K              | 80                 |
| Hess KR et al.,<br>J Clin Oncol 2006               | MDA133                                                                                                              | 133           | Affymetrix<br>U133A         | 22K              | 133                |
| Desmedt C et al.,<br>Clin Cancer Res 2007          | GEO: GSE7390                                                                                                        | 198           | Affymetrix<br>U133A         | 22K              | 154                |
| Bonnefoi et al.,<br>Lancet Oncol 2007              | GEO: GSE6861,<br>GSE4779                                                                                            | 161           | Affymetrix<br>X3P           | 61K              | 125                |
| Klein A et al.,<br>Int J Cancer 2007               | GEO: GSE6596                                                                                                        | 26            | Affymetrix<br>U133A         | 22K              | 24                 |
| Schmidt M et al.,<br>Cancer Res 2008               | GEO: GSE11121                                                                                                       | 200           | Affymetrix<br>U133A         | 22K              | 200                |
| Yu K et al.,<br>PLoS Genet 2008                    | GEO: GSE5364                                                                                                        | 196           | Affymetrix<br>U133A         | 22K              | 183                |
| Merritt WM et al.,<br>N Engl J Med 2008            | Array Express: E-<br>MTAB-158                                                                                       | 130           | Affymetrix<br>U133AAofAv2   | 23K              | 130                |
| Marty et al.,<br>Breast Cancer Res 2008            | GEO: GSE13787                                                                                                       | 23            | Affymetrix<br>U133 Plus 2.0 | 54K              | 23                 |
| Bos et al.,<br>Nature 2009                         | GEO: GSE12276                                                                                                       | 204           | Affymetrix<br>U133 Plus 2.0 | 54K              | 204                |
| Zhang Y et al.,<br>Breast Cancer Res Treat<br>2009 | GEO: GSE12093                                                                                                       | 136           | Affymetrix<br>U133A         | 22K              | 136                |
| Hoeflich et al.,<br>Clin Cancer Res 2009           | GEO: GSE12763                                                                                                       | 30            | Affymetrix<br>U133 Plus 2.0 | 54K              | 30                 |
| Jonsson et al.,<br>BCR 2010                        | GEO: GSE22133                                                                                                       | 359           | Swegene<br>H_v2.1.1 55K     | 55K              | 346                |

**Supplementary Table 1: Patients databases used for analysis**

| Reference                                               | Source of data                 | N° of samples | Technological platform      | N° of probe sets | N° of samples used |
|---------------------------------------------------------|--------------------------------|---------------|-----------------------------|------------------|--------------------|
| Prat A et al.,<br>Breast Cancer Res 2010                | GEO: GSE18229                  | 337           | Agilent Hu25K               | 25K              | 264                |
| Popovici V et al.,<br>Breast Cancer Res 2010            | GEO: GSE20194                  | 278           | Affymetrix<br>U133A         | 22K              | 91                 |
| Chen et al.,<br>Breast Cancer Res Treat<br>2010         | GEO: GSE10780                  | 185           | Affymetrix<br>U133 Plus 2.0 | 54K              | 42                 |
| Tabchy A et al.,<br>Clin Cancer Res 2010                | GEO: GSE20271                  | 178           | Affymetrix<br>U133A         | 22K              | 178                |
| Miller WR et al.,<br>Breast Cancer Res 2010             | GEO: GSE5462                   | 116           | Affymetrix<br>U133A         | 22K              | 116                |
| Silver et al.,<br>J Clin Oncol 2010                     | GEO: GSE18864                  | 84            | Affymetrix<br>U133 Plus 2.0 | 54K              | 84                 |
| Korde et al.,<br>Breast Cancer Res Treat<br>2010        | GEO: GSE18728                  | 61            | Affymetrix<br>U133 Plus 2.0 | 54K              | 61                 |
| Barry et al.,<br>J Clin Oncol 2010                      | GEO: GSE23593                  | 50            | Affymetrix<br>U133 Plus 2.0 | 54K              | 50                 |
| Van der Auwera et al.,<br>Br J Cancer 2010              | Array Express: E-<br>MTAB-1006 | 96            | Affymetrix<br>U133 Plus 2.0 | 54K              | 96                 |
| Guedj et al.,<br>Oncogene 2011                          | Array Express: E-<br>MTAB-365  | 537           | Affymetrix<br>U133 Plus 2.0 | 54K              | 452                |
| Hatzis C et al.,<br>JAMA 2011                           | GEO: GSE25066                  | 508           | Affymetrix<br>U133A         | 22K              | 508                |
| Sabatier R et al., (our<br>IPC series)<br>PLoS One 2011 | GEO: GSE31448                  | 353           | Affymetrix<br>U133 Plus 2.0 | 54K              | 352                |
| Iwamoto T et al.,<br>J Natl Cancer Inst 2011            | GEO: GSE22093,<br>GSE23988     | 164           | Affymetrix<br>U133A         | 22K              | 100                |
| Desmedt et al.,<br>J Clin Oncol 2011                    | GEO: GSE16446                  | 120           | Affymetrix<br>U133 Plus 2.0 | 54K              | 120                |
| Pusztai et al.,<br>Breast Cancer Res Treat<br>2011      | GEO: GSE22597                  | 83            | Affymetrix<br>U133A         | 22K              | 83                 |
| Curtis et al.,<br>Nature 2012                           | EGA:<br>EGAS00000000083        | 2136          | Illumina HT 12              | 49K              | 1974               |
| TCGA,<br>Nature 2012                                    | TCGA Data Portal -<br>BRCA -   | 1215          | Illumina,<br>RNAseq V2      | 20K              | 1095               |
| Ellis et al.,<br>Nature 2012                            | GEO: GSE29442,<br>GSE35186     | 201           | Agilent-014850<br>4x44K     | 44K              | 201                |
| TOTAL                                                   |                                | 10329         |                             |                  | 9236               |

**Supplementary Table 2: Clinicopathological characteristics of sample**

| Characteristics                     |           | N (%)           |
|-------------------------------------|-----------|-----------------|
| Age at diagnosis (years)            | ≤50       | 2650 (36%)      |
|                                     | >50       | 4630 (64%)      |
| AJCC Stage                          | 1         | 1006 (36%)      |
|                                     | 2         | 1130 (40%)      |
|                                     | 3         | 599 (21%)       |
|                                     | 4         | 82 (3%)         |
| Pathological type                   | ductal    | 4184 (79%)      |
|                                     | lobular   | 514 (10%)       |
|                                     | other     | 580 (11%)       |
| Pathological grade                  | 1         | 739 (11%)       |
|                                     | 2         | 2633 (40%)      |
|                                     | 3         | 3151 (48%)      |
| Pathological lymph node status (pN) | negative  | 3667 (57%)      |
|                                     | positive  | 2789 (43%)      |
| Pathological tumor size (pT)        | pT1       | 2117 (37%)      |
|                                     | pT2       | 2926 (52%)      |
|                                     | pT3       | 605 (11%)       |
| ER status (mRNA)                    | negative  | 2867 (31%)      |
|                                     | positive  | 6369 (69%)      |
| PR status (mRNA)                    | negative  | 4818 (52%)      |
|                                     | positive  | 4361 (48%)      |
| HER2 status (mRNA)                  | negative  | 8087 (88%)      |
|                                     | positive  | 1149 (12%)      |
| Molecular subtypes                  | HR+/HER2- | 6061 (66%)      |
|                                     | HER2+     | 1149 (12%)      |
|                                     | TN        | 2007 (22%)      |
| Follow-up, median (months)          |           | 57.2 (0-299.24) |
| Metastatic relapse                  |           | 899 (24%)       |
| 5-year MFS [95%CI]                  |           | 74% [72-75]     |

**Supplementary Table 3: Histo-clinical variables analyses**

| logistic regression HC grp 'II' vs. 'I' | Univariate |                   |                  |
|-----------------------------------------|------------|-------------------|------------------|
|                                         | N          | Odds-ratio [CI95] | p-value          |
| age.g, >50 vs. <= 50 years              | 7280       | 0.77 [0.71-0.84]  | <b>1.10E-07</b>  |
| Grade, 2 vs. 1                          | 6523       | 1.57 [1.36-1.81]  | <b>2.79E-07</b>  |
| Grade, 3 vs. 1                          | 6523       | 3.36 [2.92-3.88]  | <b>1.84E-44</b>  |
| pN, 1 vs. 0                             | 6252       | 1.2 [1.1-1.3]     | <b>3.78E-04</b>  |
| pT, pT2 vs. pT1                         | 5648       | 1 [0.91-1.1]      | 0.965            |
| pT, pT3 vs. pT1                         | 5648       | 0.98 [0.85-1.14]  | 0.858            |
| Histology, ILC vs. IDC                  | 5278       | 1.04 [0.89-1.21]  | 0.664            |
| Histology, other vs. IDC                | 5278       | 0.85 [0.74-0.98]  | 0.069            |
| Mol. subtype, HER2+ vs. HR+/HER2-       | 9217       | 2.29 [2.05-2.55]  | <b>5.41E-36</b>  |
| Mol. subtype, TN vs. HR+/HER2-          | 9217       | 3.8 [3.46-4.17]   | <b>1.85E-123</b> |
| RT adj, 1 vs. 0                         | 2102       | 1.59 [1.37-1.84]  | <b>2.42E-07</b>  |
| CT adj, 1 vs. 0                         | 6260       | 1.87 [1.67-2.08]  | <b>4.78E-21</b>  |
| HT adj, 1 vs. 0                         | 4912       | 0.65 [0.59-0.72]  | <b>1.47E-13</b>  |

**Supplementary Table 4: Univariate and multivariate analyses of correlation between overexpression of C(X)C genes with CSC-associated profiles.**

| logistic regression HC grp 'II' vs. 'I'     | Univariate |                   |                  |
|---------------------------------------------|------------|-------------------|------------------|
|                                             | N          | Odds-ratio [CI95] | p-value          |
| Prat, Claudin-low vs. non claudin-low       | 9236       | 3.93 [3.38-4.55]  | <b>7.60E-52</b>  |
| Lim, luminal prog vs. mature luminal        | 9236       | 8.69 [7.88-9.59]  | <b>2.80E-288</b> |
| Lim, MaSC vs. mature luminal                | 9236       | 4.41 [4.02-4.83]  | <b>1.32E-156</b> |
| Prat differentiation, pL->mL vs. MaSC -> pL | 9236       | 0.27 [0.25-0.29]  | <b>2.13E-188</b> |
| Charafe, ALDH1pos-like vs. ALDH1neg-like    | 9236       | 1.29 [1.21-1.39]  | <b>6.45E-10</b>  |
| Creighton, CD44+/CD24- like yes vs. no      | 9236       | 0.14 [0.12-0.16]  | <b>1.56E-98</b>  |

| logistic regression HC grp 'II' vs. 'I'     | Multivariate * |                   |                 |
|---------------------------------------------|----------------|-------------------|-----------------|
|                                             | N              | Odds-ratio [CI95] | p-value         |
| Prat, Claudin-low vs. non claudin-low       | 2017           | 5.29 [1.88-14.84] | <b>7.95E-03</b> |
| Lim, luminal prog vs. mature luminal        | 2017           | 7.29 [5.74-9.24]  | <b>5.26E-43</b> |
| Lim, MaSC vs. mature luminal                | 2017           | 4.54 [3.69-5.59]  | <b>5.20E-33</b> |
| Prat differentiation, pL->mL vs. MaSC -> pL | 2017           | 0.37 [0.3-0.44]   | <b>3.57E-19</b> |
| Charafe, ALDH1pos-like vs. ALDH1neg-like    | 2017           | 1.00 [0.85-1.17]  | 0.959           |
| Creighton, CD44+/CD24- like yes vs. no      | 2017           | 0.09 [0.06-0.13]  | <b>4.25E-20</b> |

\* multivariate vars (p5% UV) : Age Diag, Grade, pN, molecular subtype, RT, HT & CT

**Supplementary Table 5: Chemokines receptors membrane expression in SUM159PT cells.** SUM159PT were immunostained with specific antibodies and analysed by flow cytometry for the membrane expression of various chemokines receptors expression. Flow panels are available in Supplementary Figure 3.

| <b>Receptors</b> | <b>Ligands</b>           | <b>Expression</b> |
|------------------|--------------------------|-------------------|
| CCR1             | CCL3,4,5,7,14,15,16,23   | 0.5-1%            |
| CCR3             | CCL5,7,11,13,15,24,26,28 | 0.1 %             |
| CCR4             | CCL2,3,5,17,22           | 0.1%              |
| CCR5             | CCL3,4,5,8               | 10-15%            |
| CCR6             | CCL20                    | <0.5%             |
| CCR7             | CCL19,21                 | 0.5 %             |
| CXCR2            | CXCL1,2,3,5,6,7,8        | 1-2%              |
| CXCR3            | CXCL9,10,11              | 2-5%              |

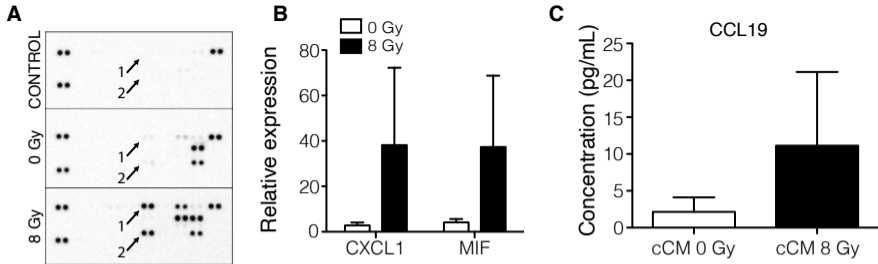

**Supplementary Figure 1: Radiation-induced secretion of cytokines.** (a) ALDH-/low non-CSCs were sorted and seeded in monolayer. Twenty-four hours after seeding, the cells were irradiated at 0 or 8 Gy. Five days after irradiation, CM was collected and analyzed by a chemokine array. The control consisted of fresh medium incubated for 6 days without cells at 37°C and 5% CO<sub>2</sub>. CXCL1 (1) and MIF (2) are indicated by arrows. (b) Relative expression of cytokines that was modified after irradiation. (c) Relative quantification of CCL19 by ELISA in 5-fold concentrated CM (cCM). As described before, CM was collected five days after irradiation and concentrated with an Amicon Ultra 10k. Data are represented by means  $\pm$  SEM. n = 3.

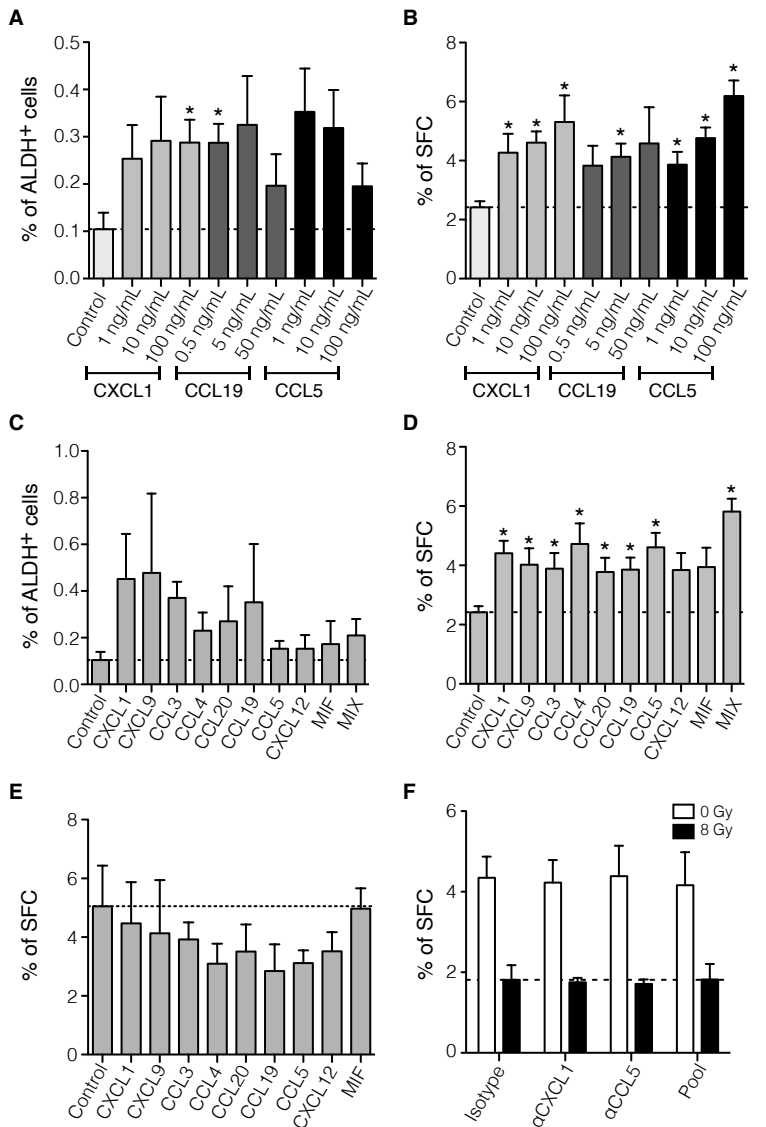

**Supplementary Figure 2: Chemokines are involved in radiation-induced reprogramming.** (a, b) Freshly sorted non-CSCs were seeded in a monolayer. Twenty-four hours after seeding, the cells were treated with different concentrations of chemokines CXCL1, CCL19 and CCL5. The control cells were treated with PBS 0.1% BSA. Five days after the treatments, Aldefluor assay was performed (a), and the sphere-forming capacity was evaluated (b). Data are represented by means  $\pm$  SEM. \* $p < 0.05$ , t-test,  $n = 3$ . (c, d) Individual chemokine treatments or mixed treatment (concentrations in Materials and Methods) were performed using freshly sorted non-CSC 24 hours after sorting. The control cells were treated with PBS 0.1% BSA. Five days after the treatments, Aldefluor assay was performed (c), and the sphere-forming capacity was evaluated (d). Data are represented by means  $\pm$  SEM. \* $p < 0.05$ , t-test,  $n = 3$ . (e) The same experiment was performed on bulk SUM159PT cells without sorting. Cells were plated in monolayer conditions. Twenty-four hours later, cells were treated with chemokines at the usual concentrations. Five days after the treatments, the sphere-forming capacity was evaluated. Data are represented by means  $\pm$  SEM. \* $p < 0.05$ , t test,  $n = 3$ . (f) Freshly sorted non-CSCs were treated with CM from irradiated non-CSCs supplemented with neutralizing antibodies targeting CXCL1 and CCL5 or isotype controls. Five days after treatment, the cells were seeded under low adherence conditions, and the sphere-forming capacity of the treated cells was analyzed. Data are represented by means  $\pm$  SEM.  $n = 3$ .

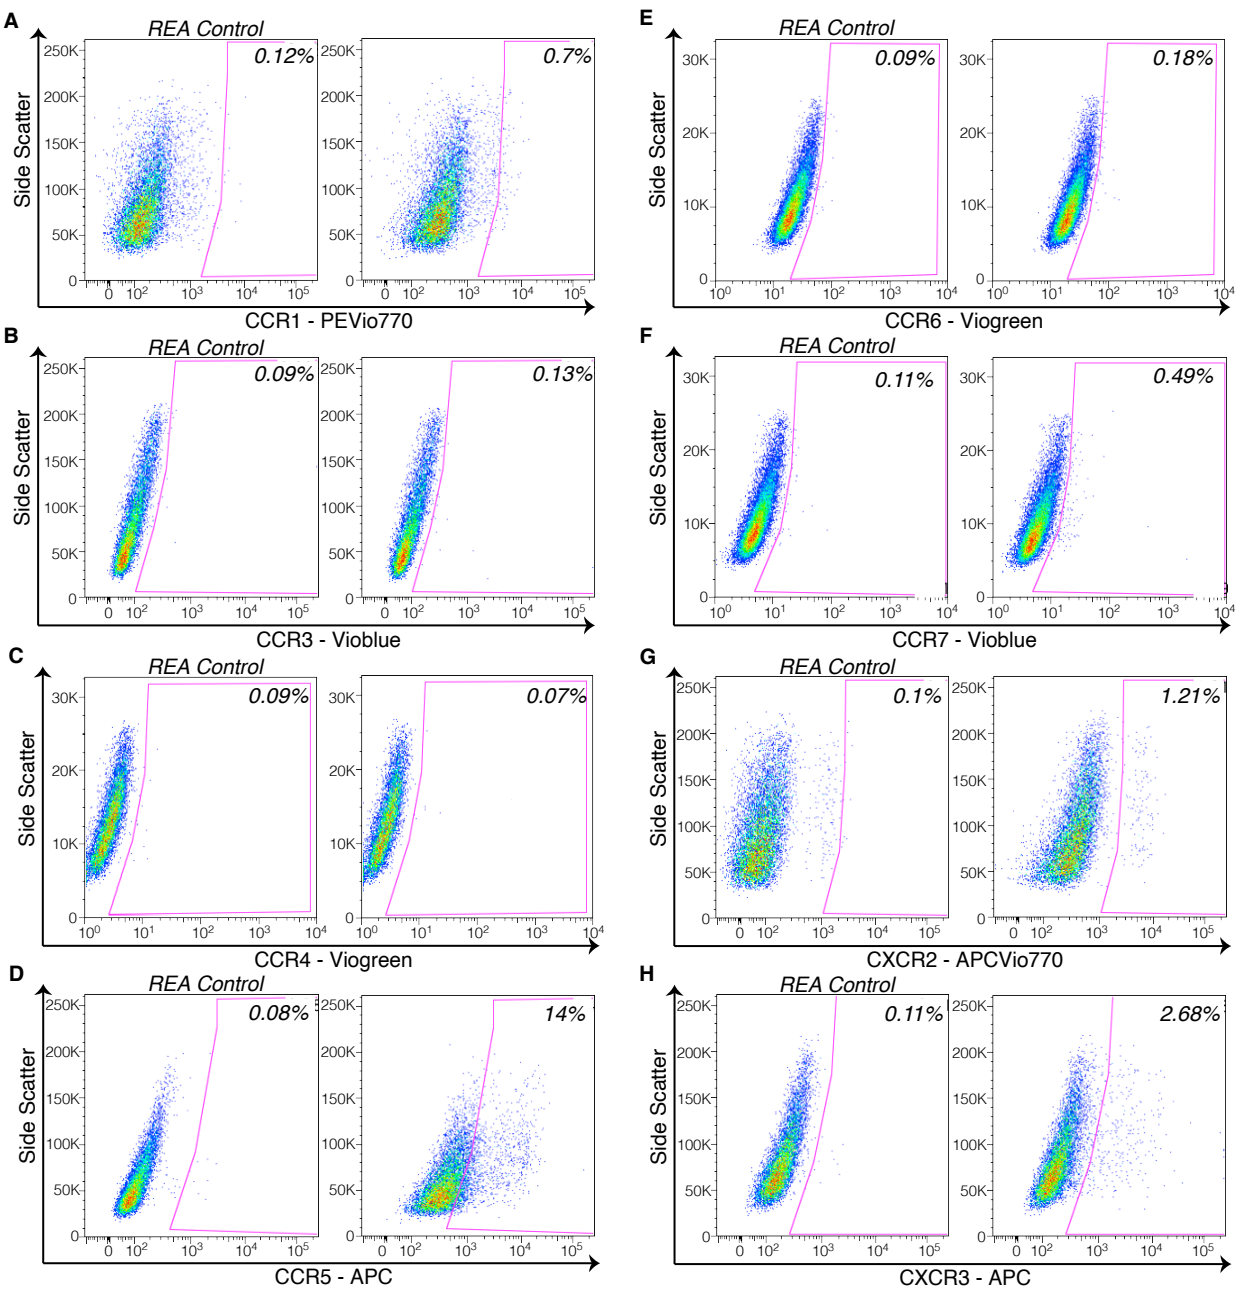

**Supplementary Figure 3: Chemokines receptors membrane expression in SUM159PT cells.** SUM159PT were immunostained with antiCCR1-PEVio770 (a), antiCCR3-Vioblue (b), antiCCR4-Biotin and antiBiotin-Viogreen (c), antiCCR5-APC (d), antiCCR6-Biotin and antiBiotin-Viogreen (e), antiCCR7-Vioblue (f), antiCXCR2-APCVio770 (g) and antiCXCR3-APC (h). A REA control staining was performed for each condition (left figure on each panel), to define the positive population. Cells were analyzed by flow cytometry.

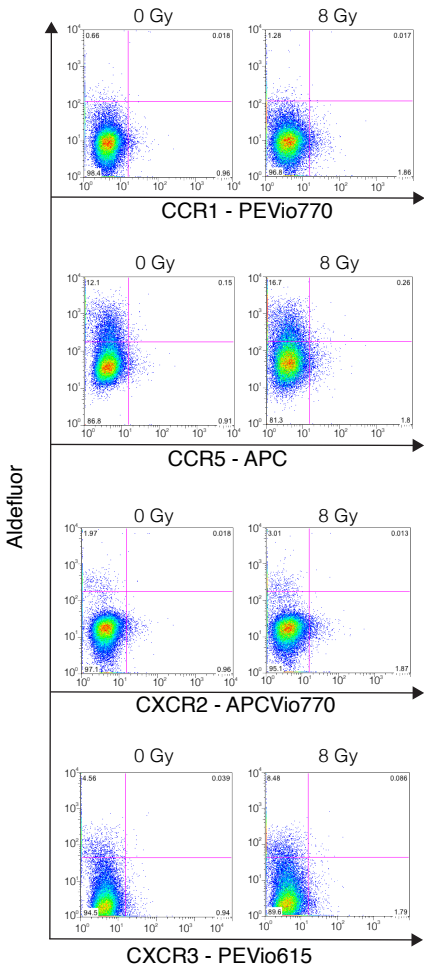

**Supplementary Figure 4: Membrane expression of chemokine receptors after irradiation.** Expression of CCR1, CCR5, CXCR2, and CXCR3 in Aldefluor stained cells by flow cytometry. A representative illustration of ALDH assay and individual receptor expression analyzed by flow

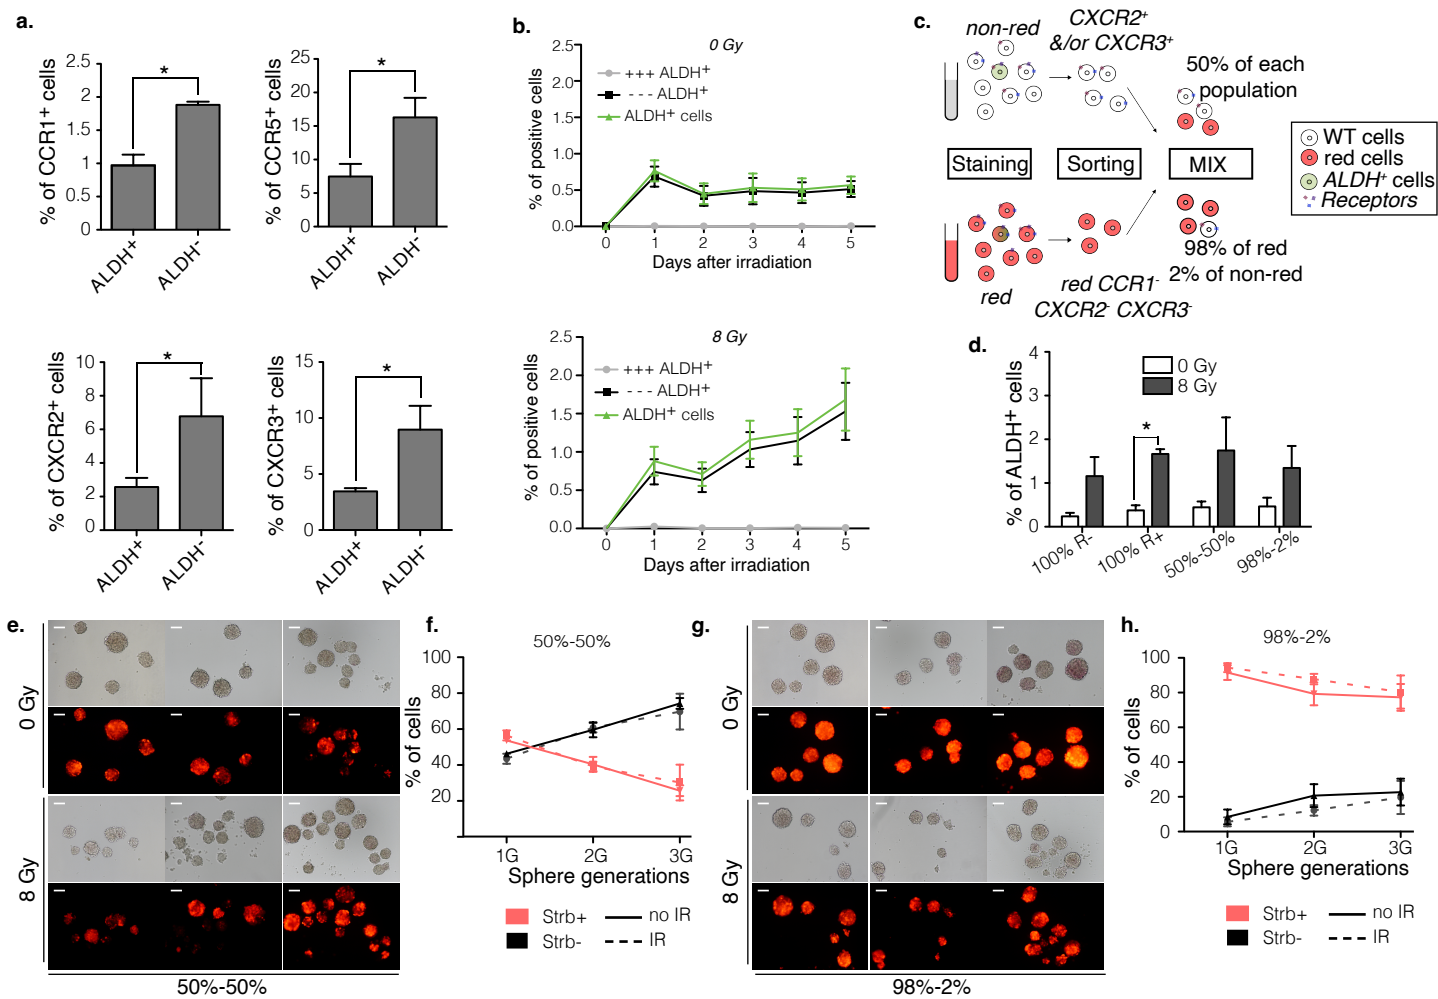

**Supplementary Figure 5: Dynamique of expression and cell population expression CCR/CXCR.** Membrane expression of chemokine receptors after irradiation and reprogrammable potential of receptors positive cells. (a) Expression of CCR1, CCR5, CXCR2, and CXCR3 in Aldefluor stained cells by flow cytometry. Data are represented by means  $\pm$  SEM. \* $p < 0.008$ , t-test,  $n = 3$ . (b) ALDH-/low non-CSCs were sorted for their receptors expression, and CCR1- CXCR2- CXCR3- non-CSCs were seeded and irradiated. Every day after irradiation, the cells were analyzed by flow cytometry for ALDH status and receptor expression, in particular cells expressing CCR1, CXCR2, and CXCR3. The light gray line represents CCR1+ CXCR2+ CXCR3+ ALDH+ cells; the dark line shows CCR1- CXCR2- CXCR3- ALDH+ cells, The green line illustrates ALDH+ cells. Triple-positive and triple-negative cell populations were compared to bulk population. Data are represented by means  $\pm$  SEM, two-way ANOVA test (comparing 0 vs 8 Gy for each sub-conditions: Bulk, ALDH-, ALDH+),  $n = 3$ . (c) Sorting protocol for SUM159PT WT and SUM159PT Strawberry+ cells (red). Each cell line was sorted based on ALDH staining and their receptor expression (either "ALDH- CXCR2- CXCR3-" or "ALDH- CXCR2+ and/or CXCR3+"). Cells were mixed as follows: 50% of WT "ALDH- CXCR2+ and/or CXCR3+" and 50% of Strawberry+ "ALDH- CXCR2- CXCR3-"; 2% of WT "ALDH- CXCR2+ and/or CXCR3+" and 98% of Strawberry+ "ALDH- CXCR2- CXCR3-". Cells were then irradiated as usual. (d) Aldefluor assay of the different populations 5 days after irradiation. Data are represented by means  $\pm$  SEM. \* $p < 0.002$ , t-test,  $n = 3$ . (e, g) Representative photographs of spheres from mixed populations of different generations. Photos were obtained with a Nikon Eclipse Ti microscope, 10x lens. Scale corresponds to 100  $\mu$ m. (f, h) represent the percentage of Stb+ cells determined by flow cytometry. Data are represented by means  $\pm$  SEM. \* $p < 0.004$ , two-way ANOVA test,  $n = 4$

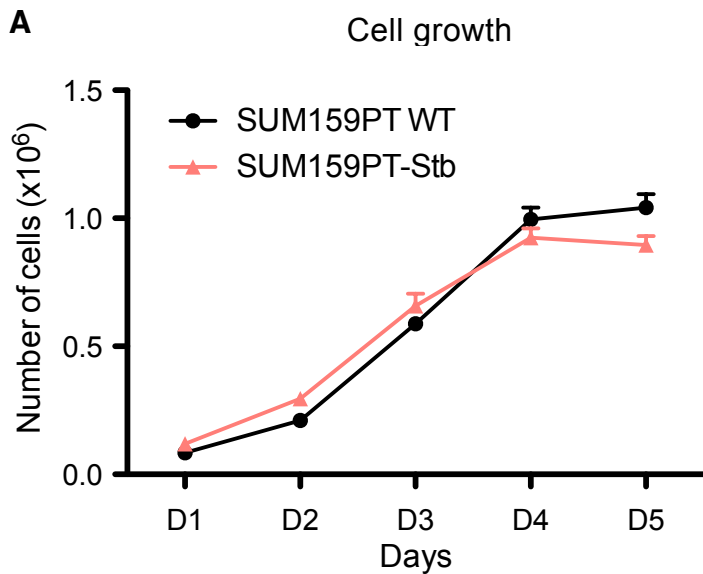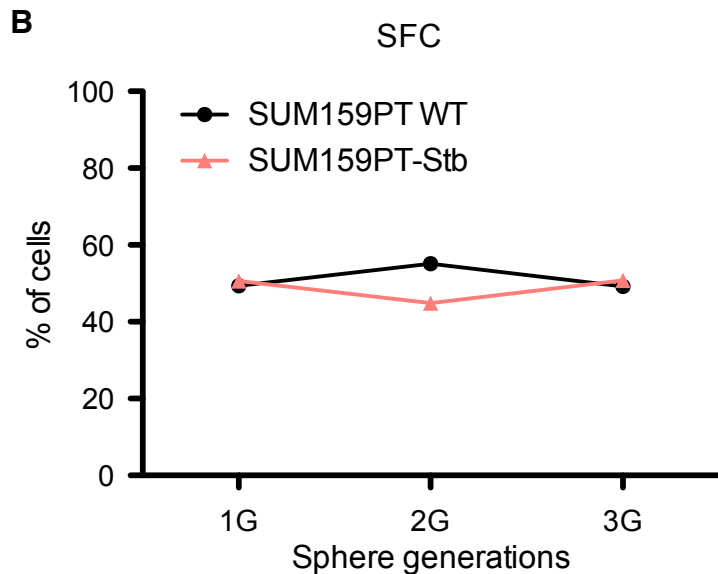

**Supplementary Figure 6: SUM159PT-Strawberry controls.** (a, b) SUM159PT WT and SUM159PT-Strawberry cells were seeded in monolayer (a) or equally mixed and seeded in suspension (b). (a) The number of cells was evaluated every day for 5 days by cell counting.  $n = 2$ . (b) For 3 generations of spheres, cells were dissociated as previously described, and the proportion of each population (WT or Strawberry) was assessed by flow cytometry.  $n = 1$ .

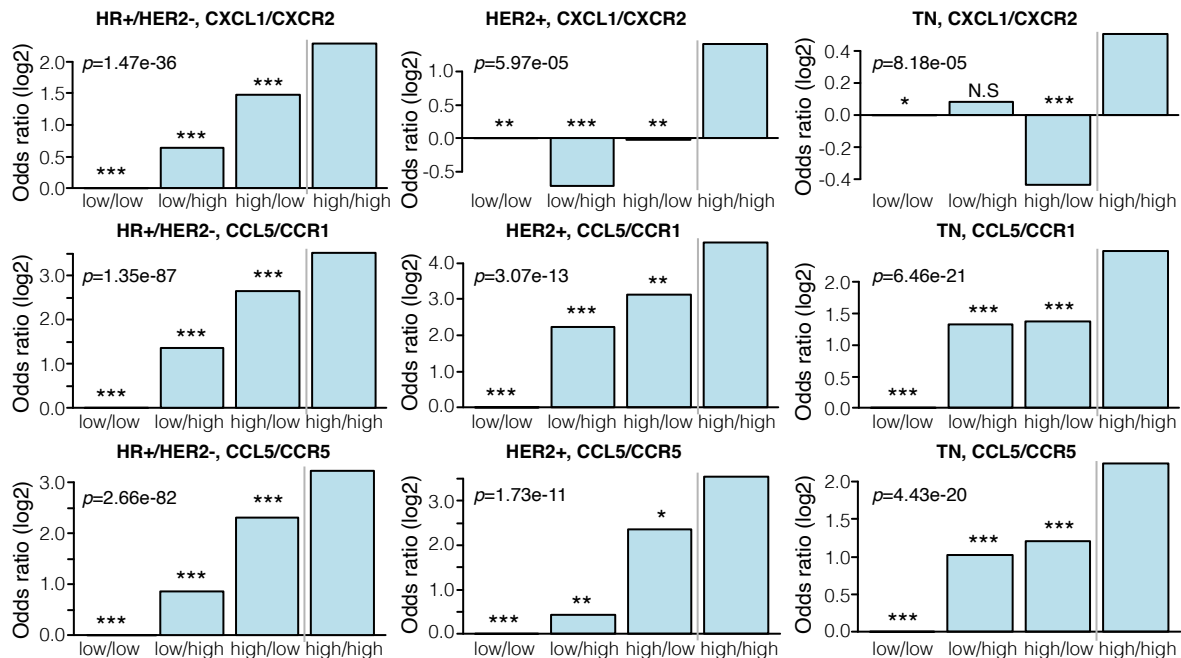

**Supplementary Figure 7: Correlation between stem-cell phenotype and chemokine expression within BC subtypes.** We evaluated the correlation by logistic regression with classification according to the stem cell signature as variable and to be explained. Four levels of expression were used: high/high, high/low, low/high and low/low, and low/low as a reference. The modality coefficient was plotted, and ANOVA was applied to evaluate significant correlations. \*, corresponds to a significant t-test between each level of expression compared with the high/high condition.

### All, CXCL1/CXCR2

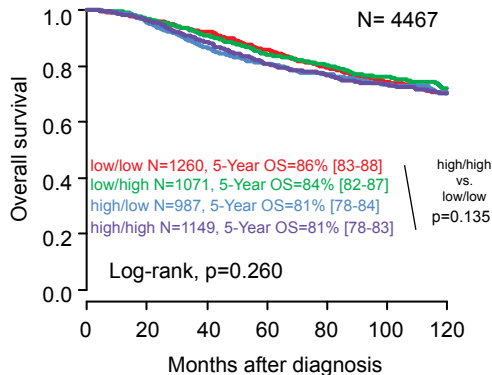

### All, CCL5/CCR1

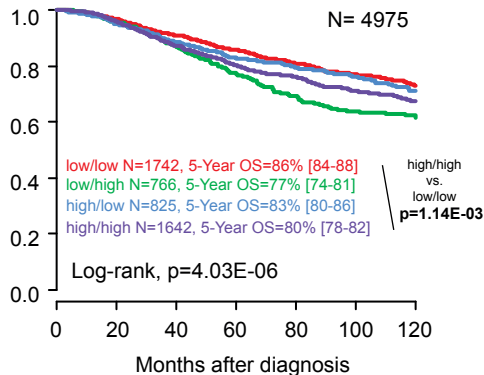

### All, CCL5/CCR5

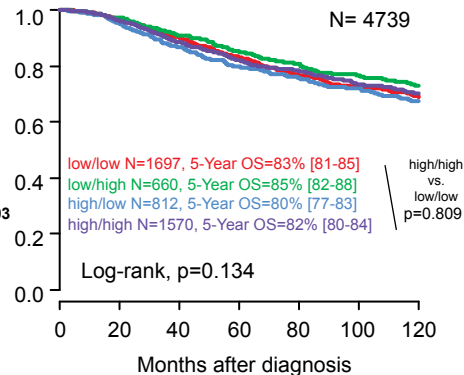

**Supplementary Figure 8: Overall survival (OS) of patients with breast cancer stratified according to C(X)CR and C(X)CL pair expression.** The Kaplan-Meier curves are shown. log-rank test. N = 4467 to 4975. Individual curves have been compared using a one-way ANOVA test.

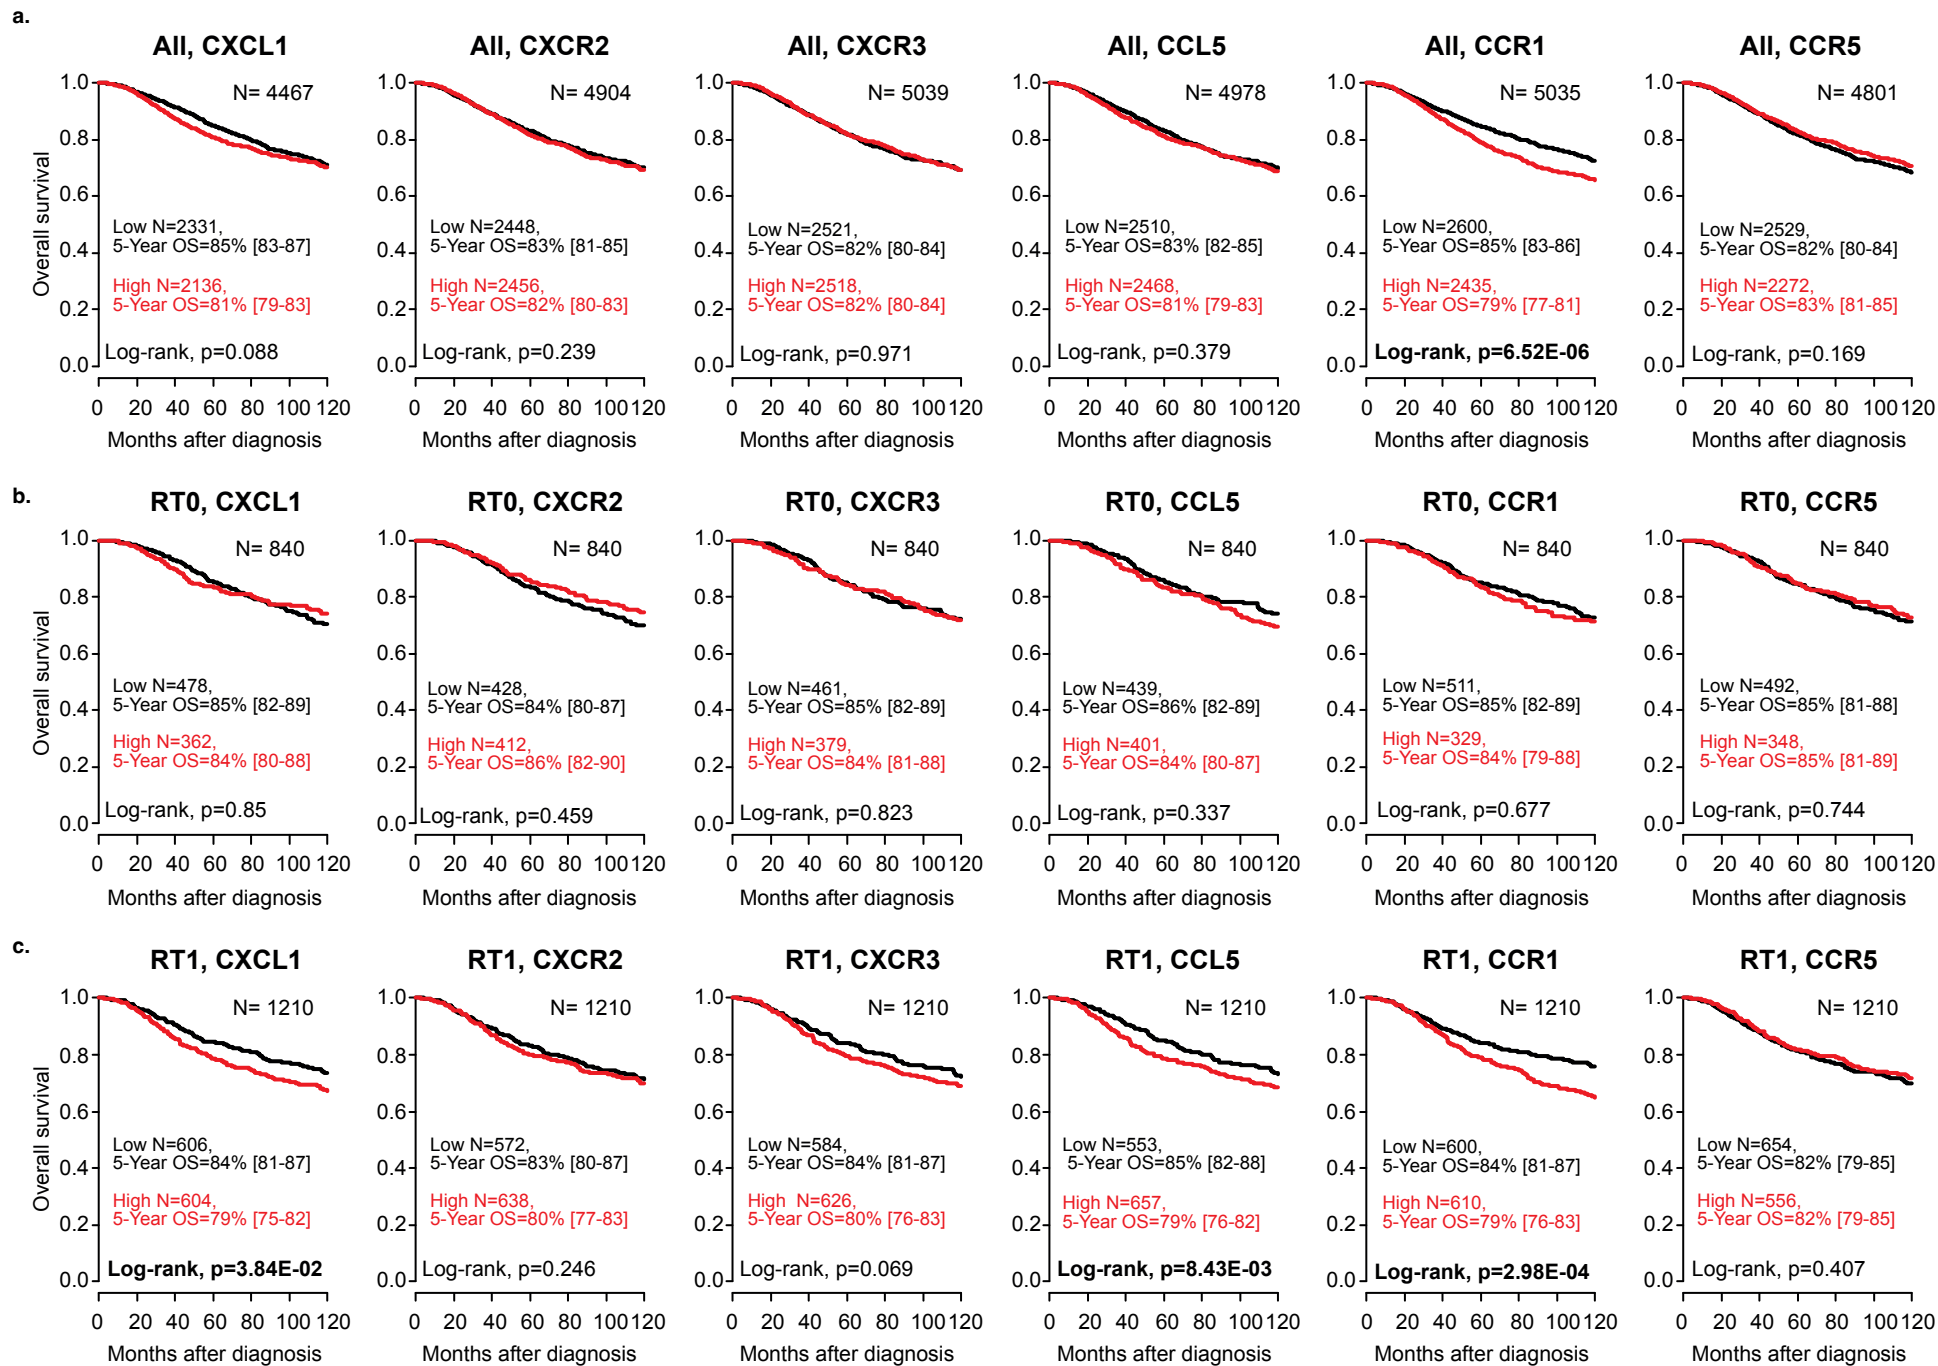

**Supplementary Figure 9: Overall survival (OS) of patients with breast cancer stratified according to C(X)CR or C(X)CL pair expression and cluster by treatment. (a)** Unclustered patients according to their treatment, **(b)** cluster of patients who didn't receive radiotherapy and **(c)** cluster of patients who have been treated with radiotherapy. Overall survival was followed over 120 months. log-rank test. N=840 to 5039.
